# Supplementary material
Source: publisher figshare collection journal article supplement (https://gsajournals.figshare.com/ndownloader/files/25417238)
Supplement: Supplementary file 1 [file 25417238]

Supplementary Material

**Evolution of Chi motifs in Proteobacteria**

Angélique Buton & Louis-Marie Bobay

Department of Biology, University of North Carolina Greensboro, 321 McIver Street, PO Box 26170, Greensboro, NC 27402, USA

**Table S4.** Number of species identified with Chi motifs across Markov models (830 motifs searched).

| **Markov model** | **Number of species** | **Proteobacteria** | **%** | **Terrabacteria** | **%** |
| --- | --- | --- | --- | --- | --- |
| M0 | 0 | 0 | 0 | 0 | 0 |
| M1 | 0 | 0 | 0 | 0 | 0 |
| M2 | 40 | 27 | 67,5 | 13 | 32,5 |
| M3 | 14 | 7 | 50 | 7 | 50 |
| M4 | 6 | 3 | 50 | 3 | 50 |
| M5 | 11 | 10 | 90,9 | 1 | 9,1 |
